# Supplementary material
Source: PubMed Central journal article supplement (PMC3461271)
Supplement: NIHMS399987-supplement-1.pdf [file NIHMS399987-supplement-1.pdf]

## Calcium entry induces mitochondrial oxidant stress in vagal neurons at risk in Parkinson's disease

Joshua A. Goldberg, Jaime N. Guzman, Chad M. Estep, Ema Ilijic, Jyothisri Kondapalli, Javier Sanchez-Padilla and D. James Surmeier

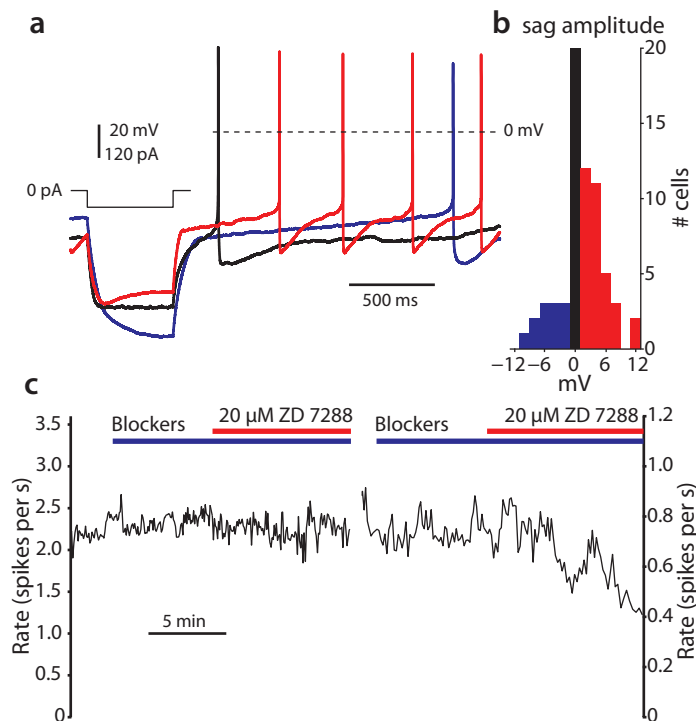

**Supplementary Figure 1** HCN currents in cholinergic DMV neurons. **(a)** DMV neurons were heterogeneous with regard to expression of HCN currents, which activate in response to a 60 pA hyperpolarizing pulse causing the voltage to depolarize (sag). **(b)** distribution of the size of the voltage sag reveals that approximately half of the cells (33/65) exhibit a sag (shown in red). **(c)** autonomous firing rate measured in cell attached configuration was not affected by washing on of 20 μM ZD 7288 in 4/7 cells (left panel) but slowed down pace-making in the remaining 3 (right panel).

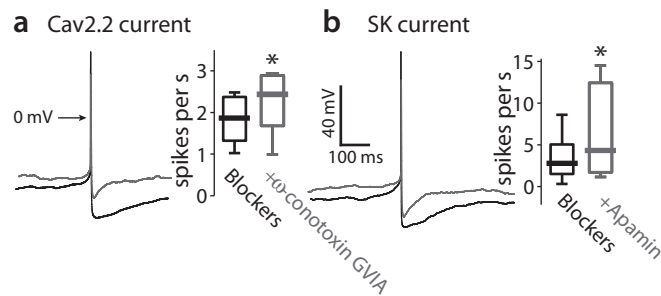

**Supplementary Figure 2** Contribution of Cav2 and SK channels to discharge patterns in DMV neurons. **(a)** application of 1  $\mu$ M  $\omega$ -conotoxin GVIA, a Cav2.2 (N-type) calcium channel blocker, reduced the mAHP that followed each spike during pacemaking, resulting in a mild but significant speeding up of the firing rate [median increase of 28% in firing rate,  $n = 7$ ,  $P < 0.05$ , Wilcoxon signed-rank test (SRT) for paired samples]. **(b)** the SK channel blocker, apamin, affected the mAHP in a similar fashion and resulted in a significant and larger increase in firing rate (median increase of 61% in firing rate,  $n = 6$ ,  $P < 0.05$ , SRT).
